# Supplementary material for: Highly flexible silica aerogels derived from methyltriethoxysilane and polydimethylsiloxane
Source: Royal Society of Chemistry journal article supplement (doi:10.1039/c5nj01477h), 2015-01-01
Supplement: c5nj01477h1.pdf [file c5nj01477h1.pdf]

## Electronic Supplementary Information

### Highly Flexible Silica Aerogel Derived from Methyltriethoxysilane and Polydimethylsiloxane

Liang Zhong,<sup>a</sup> Xiaohong Chen,<sup>\*a</sup> Huaihe Song,<sup>a</sup> Kang Guo<sup>a</sup> and Zijun Hu<sup>\*b</sup>

<sup>5</sup> Moives M<sub>1</sub> shows the first 5 times of the 20 consecutive compression to 60% strain for aerogel S<sub>5</sub>.
